# Supplementary material for: p53-Mediated PI3K/AKT/mTOR Pathway Played a Role in PtoxDpt-Induced EMT Inhibition in Liver Cancer Cell Lines
Source: PubMed Central journal article supplement (PMC6525883; doi:10.1155/2019/2531493), 2019-05-05
Supplement: 2531493.f1.pdf [file 2531493.f1.pdf]

## Supplementary Materials

*Synthetic route of di-2,2'-pyridineketone hydrazone dithiocarbamate S-propionic acid podophyllotoxin ester (Ptox<sup>Dpt</sup>)*

The details for Ptox<sup>Dpt</sup> preparation as described in section of Materials and methods

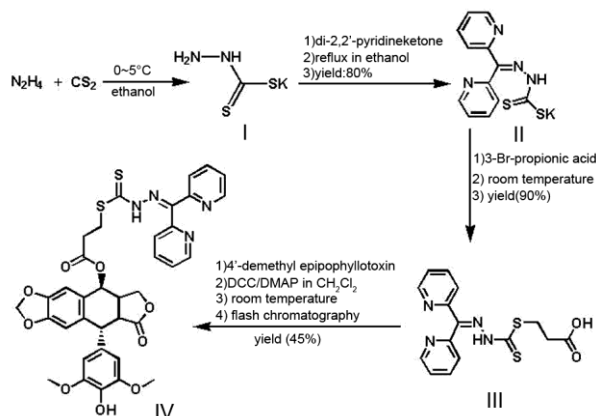

Fig. S1: synthetic route of Ptox<sup>Dpt</sup>, the condition as indicated in the scheme. The data of NMR and HRMS are shown in Methods and Materials section

*Conformation comparison of etoposide with Ptox<sup>Pdt</sup> in catalytic center of DNA Topoisomerase II*

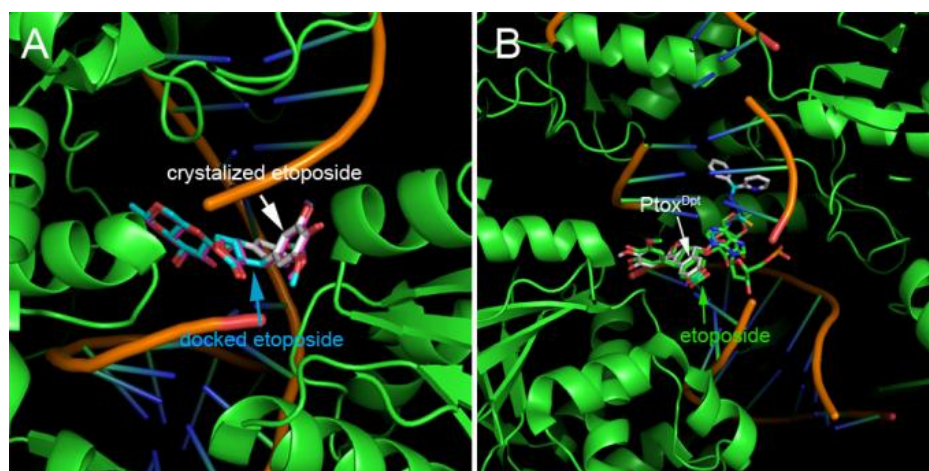

Fig. S2: Molecular simulation of etoposide and Ptox<sup>Pdt</sup>. (A) Comparison of docked etoposide with crystalized etoposide in DNA-topoisomerase complex; (B) Comparison of docked etoposide with docked Ptox<sup>Pdt</sup> in DNA-topoisomerase complex.

*Comparison of etoposide with Ptox<sup>Pdt</sup> in growth inhibition against indicated cell lines*

The protocol used was similar to that in section of Materials and methods, 4.4 Cytotoxicity assay (MTT assay).

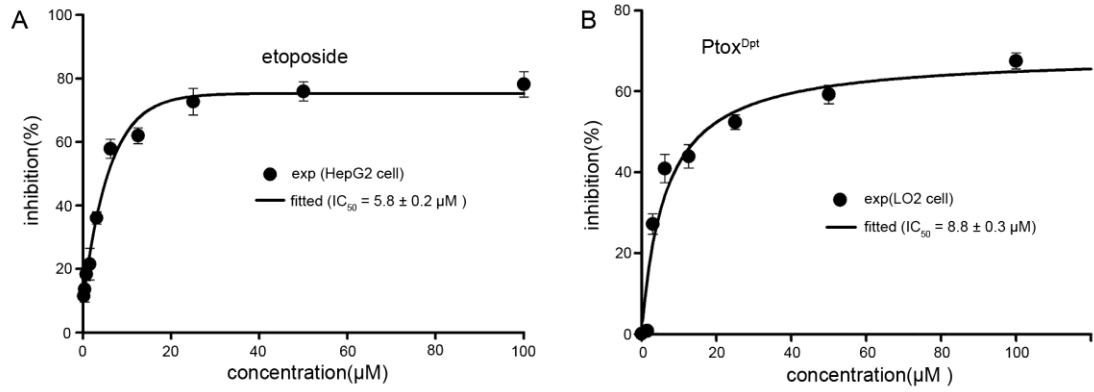

Fig. S3: Proliferation inhibition of etoposide against HepG2(A), and Ptox<sup>Dpt</sup> against normal human hepatic cell line LO2 cell (B).

*Ptox<sup>Dpt</sup> induced ROS during the time period*

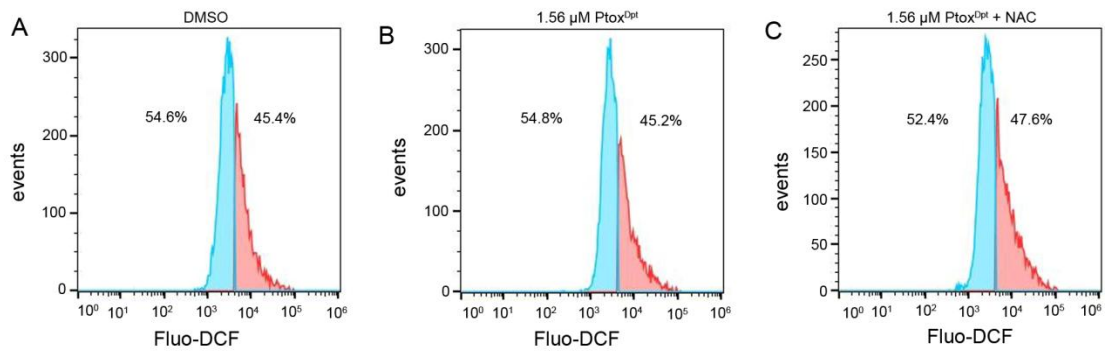

Fig. S4: ROS production induced by Ptox<sup>Dpt</sup> after 24 h during EMT reversal: (A) DMSO; (B) 1.56 μM Ptox<sup>Dpt</sup>; (C) 1.56 μM Ptox<sup>Dpt</sup> + 3 mM NAC.
